# Supplementary material for: Comparative long-term effectiveness and safety of primary bariatric surgeries in treating type 2 diabetes mellitus in adults: a protocol for systematic review and network meta-analysis of randomised controlled trials
Source: PubMed Central journal article supplement — BMJ Open. 2019 Apr 4;9(4):e028430. doi: 10.1136/bmjopen-2018-028430 (PMC6500318; doi:10.1136/bmjopen-2018-028430), 2019-04-04
Supplement: bmjopen-2018-028430supp001.pdf [file bmjopen-2018-028430supp001.pdf]

## Supplementary material 1

### **Preliminary Search Strategy in Medline (Ovid interface) for Comparative long-term effectiveness and safety of primary bariatric surgeries in treating type 2 diabetes mellitus in adults: a protocol for systematic review and network meta-analysis of randomized controlled trials**

#1 exp obesity/

#2 exp type 2 diabetes mellitus/

#3 exp weight loss/

#4 obes\*.ti,ab.

#5 over?weight.ti,ab.

#6 diabetes.ti,ab.

#7 T2D\*.ti,ab.

#8 NIDDM.ti,ab.

#9 or/1-8

#10 obesity/su

#11 exp Obesity, Morbid/su

#12 exp bariatric surgery/

#13 (surg\* adj5 bariatric).ti,ab.

#14 anti?obesity adj5 surg\*.ti,ab.

#15 malabsorptive adj5 procedure\*.ti,ab.

#16 (obes\* adj5 surg\*).ti,ab.

#17 (metaboli\* adj5 surg\*).ti,ab.

#18 exp gastric bypass/

#19 (gastroplast\* or gastrogastrostom\* or gastro?gastrostom\* or gastroenterostom\* or (gastric bypass) or (gastric surger\*) or (restrictive surger\*)).ti,ab.

#20 ((one Anastomosis) or (one-Anastomosis) or mini or (single Anastomosis)) adj5 (bypass or switch).ti,ab.

#21 ((greater curvature) or (gastric\*)) adj5 plicat\*.ti,ab.

#22 gastrectom\*.ti,ab.  
#23 LSG.ti,ab.  
#24 VSG.ti,ab.  
#25 gastrointestinal adj5 surg\*.ti,ab.  
#26 gastrointestinal diversion\*.ti,ab.  
#27 exp biliopancreatic diversion/  
#28 biliopancreatic diversion.ti,ab.  
#29 biliopancreatic bypass.ti,ab.  
#30 gastric adj5 stapl\*.ti,ab.  
#31 duodenal adj5 switch\*.ti,ab.  
#32 gastric band\*.ti,ab.  
#33 silicon band\*.ti,ab.  
#34 exp gastroenterostomy/  
#35 gastropasty/  
#36 LAGB.ti,ab.  
#37 stomach adj5 stapl\*.ti,ab.  
#38 laparoscop\* adj5 band\*.ti,ab.  
#39 lap?band\*.ti,ab.  
#40 malabsorptive adj5 surg\*.ti,ab.  
#41 mason\* adj5 procedure.ti,ab.  
#42 Roux-en-Y.ti,ab.  
#43 anastomosis, Roux-en-Y/  
#44 or/12-43  
#45 9 and 44  
#46 10 or 11 or 45  
#47 limit 46 to yr=2004 - 2018  
#48 limit 47 to (clinical trial, phase iii or clinical trial, phase iv or clinical trial  
or comparative study or controlled clinical trial or evaluation studies or  
guideline or meta analysis or multicenter study or practice guideline or  
randomized controlled trial or scientific integrity review or technical report or

twin study or validation studies or systemic review)

**#49** randomized controlled trial.pt

**#50** controlled clinical trial.pt

**#51** randomized.ab

**#52** placebo.ab

**#53** clinical trials as topic.sh.

**#54** randomly.ab

**#55** trial.ti

**#56** groups.ti,ab

**#57** or/49-56

**#58** exp animals/ not humans.sh.

**#59** 57 NOT 58

**#60** 47 and 59

**#61** 48 or 60

ab=abstract; adj = adjacent; exp =exploded; pt=publication type; sh = MeSH  
(Medical subject heading); su=surgery; ti=title; the asterisk mark (\*) substitutes  
one or no characters; the question mark (?) substitutes one character.
