# Supplementary material for: Comparative long-term effectiveness and safety of primary bariatric surgeries in treating type 2 diabetes mellitus in adults: a protocol for systematic review and network meta-analysis of randomised controlled trials
Source: PubMed Central journal article supplement — BMJ Open. 2019 Apr 4;9(4):e028430. doi: 10.1136/bmjopen-2018-028430 (PMC6500318; doi:10.1136/bmjopen-2018-028430), 2019-04-04
Supplement: bmjopen-2018-028430supp002.pdf [file bmjopen-2018-028430supp002.pdf]

## Supplementary material 2

### Preliminary Screening questions and Data Extraction Form for Comparative long-term effectiveness and safety of primary bariatric surgeries in treating type 2 diabetes mellitus in adults: a protocol for systematic review and network meta-analysis of randomized controlled trials

Reference code \_\_\_\_\_

| <b>Basic information</b>                                                    |                                                                                                                                                                                                                                                                                                                                                                                                                                                                                                                                                                                                                                                                                                                                                                                                                                                                                                                                                                                                                                                                                                                                                                                                                                                                                                                                                                                                                                                                                                                                                                                                                                                              |                    |  |
|-----------------------------------------------------------------------------|--------------------------------------------------------------------------------------------------------------------------------------------------------------------------------------------------------------------------------------------------------------------------------------------------------------------------------------------------------------------------------------------------------------------------------------------------------------------------------------------------------------------------------------------------------------------------------------------------------------------------------------------------------------------------------------------------------------------------------------------------------------------------------------------------------------------------------------------------------------------------------------------------------------------------------------------------------------------------------------------------------------------------------------------------------------------------------------------------------------------------------------------------------------------------------------------------------------------------------------------------------------------------------------------------------------------------------------------------------------------------------------------------------------------------------------------------------------------------------------------------------------------------------------------------------------------------------------------------------------------------------------------------------------|--------------------|--|
| Code of Original study                                                      |                                                                                                                                                                                                                                                                                                                                                                                                                                                                                                                                                                                                                                                                                                                                                                                                                                                                                                                                                                                                                                                                                                                                                                                                                                                                                                                                                                                                                                                                                                                                                                                                                                                              | Code of Report     |  |
| Code of Valuator                                                            |                                                                                                                                                                                                                                                                                                                                                                                                                                                                                                                                                                                                                                                                                                                                                                                                                                                                                                                                                                                                                                                                                                                                                                                                                                                                                                                                                                                                                                                                                                                                                                                                                                                              | Date of Evaluation |  |
| Contact info of Author                                                      |                                                                                                                                                                                                                                                                                                                                                                                                                                                                                                                                                                                                                                                                                                                                                                                                                                                                                                                                                                                                                                                                                                                                                                                                                                                                                                                                                                                                                                                                                                                                                                                                                                                              |                    |  |
| Quotation format(author, study title, journal, Year of publication, volume) |                                                                                                                                                                                                                                                                                                                                                                                                                                                                                                                                                                                                                                                                                                                                                                                                                                                                                                                                                                                                                                                                                                                                                                                                                                                                                                                                                                                                                                                                                                                                                                                                                                                              |                    |  |
| <b>Inclusion and exclusion criteria</b>                                     |                                                                                                                                                                                                                                                                                                                                                                                                                                                                                                                                                                                                                                                                                                                                                                                                                                                                                                                                                                                                                                                                                                                                                                                                                                                                                                                                                                                                                                                                                                                                                                                                                                                              |                    |  |
| Inclusion criteria                                                          | <p><b>Participants</b></p> <p>① Include overweight or obese adults with type 2 diabetes mellitus <span style="float: right;">yes <input type="checkbox"/> no <input type="checkbox"/></span></p> <p><b>Interventions and control</b></p> <p>② Procedures and/or controls involved</p> <p><i>Roux-en-Y gastric bypass</i> <input type="checkbox"/> <i>sleeve gastrectomy</i> <input type="checkbox"/></p> <p><i>adjustable gastric banding</i> <input type="checkbox"/></p> <p><i>biliopancreatic diversion with duodenal switch</i> <input type="checkbox"/></p> <p><i>greater curvature plication</i> <input type="checkbox"/> <i>one-anastomosis gastric bypass</i> <input type="checkbox"/></p> <p><i>single anastomosis duodenal-ileal bypass with sleeve gastrectomy</i> <input type="checkbox"/></p> <p><i>Other surgical procedure(s) except procedures no longer performed, (including biliopancreatic diversion without duodenal switch, jejunoileal bypass, horizontal or vertical gastropasty, and banding that is not adjustable) _____</i> <input type="checkbox"/></p> <p><i>non-surgical treatments</i> <input type="checkbox"/></p> <p><b>Comparisons</b></p> <p>③ Includes comparisons of at least two of the items above <span style="float: right;">yes <input type="checkbox"/> no <input type="checkbox"/></span></p> <p><b>Study designs</b></p> <p>④ Randomized controlled trial <span style="float: right;">yes <input type="checkbox"/> no <input type="checkbox"/></span></p> <p>⑤ Duration of follow-up <math>\geq 3</math> years <span style="float: right;">yes <input type="checkbox"/> no <input type="checkbox"/></span></p> |                    |  |
| Exclusion criteria                                                          | <p><b>Participants</b></p> <p>① Restrict participants to specific diseases other than type 2 diabetes mellitus <span style="float: right;">yes <input type="checkbox"/> no <input type="checkbox"/></span></p> <p>② Do not include adults <span style="float: right;">yes <input type="checkbox"/> no <input type="checkbox"/></span></p> <p>③ Do not include participants with type 2 diabetes mellitus</p> <p><b>Interventions and comparison</b></p>                                                                                                                                                                                                                                                                                                                                                                                                                                                                                                                                                                                                                                                                                                                                                                                                                                                                                                                                                                                                                                                                                                                                                                                                      |                    |  |

|                                      |                                                                                                                                                                                                                                                                                                                                                                                                                                                                                                                                                                                                                                                                                                                                                                                                                                                                                                                                                                                                                                                                                                                               |
|--------------------------------------|-------------------------------------------------------------------------------------------------------------------------------------------------------------------------------------------------------------------------------------------------------------------------------------------------------------------------------------------------------------------------------------------------------------------------------------------------------------------------------------------------------------------------------------------------------------------------------------------------------------------------------------------------------------------------------------------------------------------------------------------------------------------------------------------------------------------------------------------------------------------------------------------------------------------------------------------------------------------------------------------------------------------------------------------------------------------------------------------------------------------------------|
|                                      | <p>④ Revisional procedures <span style="float: right;">yes <input type="checkbox"/> no <input type="checkbox"/></span><br/>         Comparisons between/among surgical procedure(s) no longer performed (biliopancreatic diversion without duodenal switch, jejunoileal bypass, horizontal or vertical gastroplasty, not adjustable banding, other _____) or between such procedures and non-surgical treatment <span style="float: right;">yes <input type="checkbox"/> no <input type="checkbox"/></span><br/>         Comparisons between different techniques of the same procedure <span style="float: right;">yes <input type="checkbox"/> no <input type="checkbox"/></span></p> <p><b>Study designs</b></p> <p>⑤ Non-RCT, comparative studies <span style="float: right;">yes <input type="checkbox"/> no <input type="checkbox"/></span><br/>         ⑥ Duration of follow-up &lt; 3 year <span style="float: right;">yes <input type="checkbox"/> no <input type="checkbox"/></span><br/>         ⑦ Animal studies. <span style="float: right;">yes <input type="checkbox"/> no <input type="checkbox"/></span></p> |
| Conclusion of inclusion or exclusion | <p><input type="checkbox"/>inclusion    <input type="checkbox"/>exclusion    <input type="checkbox"/>undetermined</p> <p>Support for judgement: _____</p> <p>_____</p>                                                                                                                                                                                                                                                                                                                                                                                                                                                                                                                                                                                                                                                                                                                                                                                                                                                                                                                                                        |



|                             |                                                                                                                                                                                                                                                                                                                                                                                                                                       |              |                                                                     |
|-----------------------------|---------------------------------------------------------------------------------------------------------------------------------------------------------------------------------------------------------------------------------------------------------------------------------------------------------------------------------------------------------------------------------------------------------------------------------------|--------------|---------------------------------------------------------------------|
| Attrition (year 3)          | Lost to follow-up at year 3:<br>Number of participants lost to follow-up:<br>Group 1 _____, reason _____<br>Group 2 _____, reason _____<br>Group 3 _____, reason _____<br>Group 4 _____, reason _____                                                                                                                                                                                                                                 |              |                                                                     |
|                             | Drop-out at year 3:<br>Number of drop-out participants:<br>Group 1 _____, reason _____<br>Group 2 _____, reason _____<br>Group 3 _____, reason _____<br>Group 4 _____, reason _____                                                                                                                                                                                                                                                   |              |                                                                     |
| Attrition (year 5)          | Lost to follow-up at year 5:<br>Number of participants lost to follow-up:<br>Group 1 _____, reason _____<br>Group 2 _____, reason _____<br>Group 3 _____, reason _____<br>Group 4 _____, reason _____                                                                                                                                                                                                                                 |              |                                                                     |
|                             | Drop-out at year 5:<br>Number of drop-out participants:<br>Group 1 _____, reason _____<br>Group 2 _____, reason _____<br>Group 3 _____, reason _____<br>Group 4 _____, reason _____                                                                                                                                                                                                                                                   |              |                                                                     |
| <b>Intervention</b>         |                                                                                                                                                                                                                                                                                                                                                                                                                                       |              |                                                                     |
| Group                       | Number of Participants                                                                                                                                                                                                                                                                                                                                                                                                                | Intervention | Description of intervention(intensity, frequency and duration etc.) |
| Group 1                     |                                                                                                                                                                                                                                                                                                                                                                                                                                       |              |                                                                     |
| Group 2                     |                                                                                                                                                                                                                                                                                                                                                                                                                                       |              |                                                                     |
| Group 3                     |                                                                                                                                                                                                                                                                                                                                                                                                                                       |              |                                                                     |
| Group 4                     |                                                                                                                                                                                                                                                                                                                                                                                                                                       |              |                                                                     |
| Integrity of interventions  |                                                                                                                                                                                                                                                                                                                                                                                                                                       |              |                                                                     |
| <b>Outcome Data</b>         |                                                                                                                                                                                                                                                                                                                                                                                                                                       |              |                                                                     |
| Planned outcomes            | Planned: _____<br>Difference between report and plan: _____                                                                                                                                                                                                                                                                                                                                                                           |              |                                                                     |
| Planned time of Observation | Plan: _____<br>Difference between report and plan: _____                                                                                                                                                                                                                                                                                                                                                                              |              |                                                                     |
| Outcome data                | Definition<br>Diagnosis or evaluation: criteria for diagnosis or evaluation;<br>Laboratory examination; assay method, unit, reference range;<br>Scale: name, score range, state if higher or lower value is favorable<br>If the evaluation time doesn't concord with the follow-up time, the time point of evaluation should be specified<br>If number of missing data doesn't concord with attrition, the reason should be specified |              |                                                                     |
| Full diabetes remission     | Evaluation criteria: _____<br>Evaluation time (if not consistent) _____                                                                                                                                                                                                                                                                                                                                                               |              |                                                                     |

|                                                        |                                                                                                                                                                                                                                                   |
|--------------------------------------------------------|---------------------------------------------------------------------------------------------------------------------------------------------------------------------------------------------------------------------------------------------------|
|                                                        | Reason for extra missing data _____                                                                                                                                                                                                               |
| Partial diabetes remission                             | Evaluation criteria: _____<br>Evaluation time (if not consistent) _____<br>Reason for extra missing data _____                                                                                                                                    |
| Major adverse event                                    | Evaluation criteria: _____<br>Criteria of major adverse effect: _____<br>Evaluation time (if not consistent)<br>early complication: post-op _____ day;<br>late complication: post-op _____ day- _____ year<br>Reason for extra missing data _____ |
| Diabetes management goal including HbA1c, BP and LDL-C | Evaluation criteria: _____<br>Evaluation time (if not consistent) _____<br>Reason for extra missing data _____                                                                                                                                    |
| Percentage excess weight loss (% EWL)                  | Definition: _____<br>Unit: <input type="checkbox"/> % <input type="checkbox"/> Other _____<br>Evaluation time (if not consistent) _____<br>Reason for extra missing data _____                                                                    |
| Body mass index (BMI) at follow-up                     | Definition: _____<br>Unit: <input type="checkbox"/> kg/m <sup>2</sup> <input type="checkbox"/> Other _____<br>Evaluation time (if not consistent) _____<br>Reason for extra missing data _____                                                    |
| Weight (Wt) at follow-up                               | Definition: _____<br>Unit: <input type="checkbox"/> kg <input type="checkbox"/> Other _____<br>Evaluation time (if not consistent) _____<br>Reason for extra missing data _____                                                                   |
| Cardiovascular risk score                              | Scale name: _____<br>Score range: _____<br>which value is favorable <input type="checkbox"/> high score <input type="checkbox"/> low score<br>Evaluation time (if not consistent) _____<br>Reason for extra missing data _____                    |
| Glycated hemoglobin (HbA1C)                            | Method: _____ Reagent info _____<br>Unit: _____ Reference range: _____<br>Evaluation time (if not consistent) _____<br>Reason for extra missing data _____                                                                                        |
| Fasting blood glucose (FBG)                            | Method: _____ Reagent info _____<br>Unit: _____ Reference range: _____<br>Evaluation time (if not consistent) _____<br>Reason for extra missing data _____                                                                                        |
| total cholesterol (TC)                                 | Method: _____ Reagent info _____<br>Unit: _____ Reference range: _____<br>Evaluation time (if not consistent) _____<br>Reason for extra missing data _____                                                                                        |
| low-density lipoprotein cholesterol (LDL)              | Method: _____ Reagent info _____<br>Unit: _____ Reference range: _____<br>Evaluation time (if not consistent) _____<br>Reason for extra missing data _____                                                                                        |
| high-density lipoprotein cholesterol (HDL)             | Method: _____ Reagent info _____<br>Unit: _____ Reference range: _____<br>Evaluation time (if not consistent) _____<br>Reason for extra missing data _____                                                                                        |
| triglyceride (TG)                                      | Method: _____ Reagent info _____<br>Unit: _____ Reference range: _____<br>Evaluation time (if not consistent) _____<br>Reason for extra missing data _____                                                                                        |

|                                                             |                                                                                                                                                                                                                               |
|-------------------------------------------------------------|-------------------------------------------------------------------------------------------------------------------------------------------------------------------------------------------------------------------------------|
| Systolic blood pressure                                     | Method: _____ Model _____<br>Unit: _____ Reference: _____<br>Evaluation time (if not consistent) _____<br>Reason for extra missing data _____                                                                                 |
| Diastolic blood pressure                                    | Method: _____ Model _____<br>Unit: _____ Reference: _____<br>Evaluation time (if not consistent) _____<br>Reason for extra missing data _____                                                                                 |
| Requirement of less anti-diabetic drugs at follow-up        | Evaluation criteria: _____<br>Evaluation time (if not consistent) _____<br>Reason for extra missing data _____                                                                                                                |
| discontinuation of insulin                                  | Evaluation criteria: _____<br>Evaluation time (if not consistent) _____<br>Reason for extra missing data _____                                                                                                                |
| Progression of diabetic retinopathy                         | Evaluation criteria: _____<br>Evaluation time (if not consistent) _____<br>Reason for extra missing data _____                                                                                                                |
| Progression of diabetic nephropathy                         | Evaluation criteria: _____<br>Evaluation time (if not consistent) _____<br>Reason for extra missing data _____                                                                                                                |
| Progression of diabetic neuropathy                          | Evaluation criteria: _____<br>Evaluation time (if not consistent) _____<br>Reason for extra missing data _____                                                                                                                |
| Number of pts experiencing myocardial infarction            | Evaluation criteria: _____<br>Evaluation time (if not consistent) _____<br>Reason for extra missing data _____                                                                                                                |
| Number of pts experiencing stroke                           | Evaluation criteria: _____<br>Evaluation time (if not consistent) _____<br>Reason for extra missing data _____                                                                                                                |
| Number of pts experiencing amputation of at least one digit | Evaluation criteria: _____<br>Evaluation time (if not consistent) _____<br>Reason for extra missing data _____                                                                                                                |
| Number of pts experiencing ischemic limb disease            | Evaluation criteria: _____<br>Evaluation time (if not consistent) _____<br>Reason for extra missing data _____                                                                                                                |
| Number of pts experiencing heart failure                    | Evaluation criteria: _____<br>Evaluation time (if not consistent) _____<br>Reason for extra missing data _____                                                                                                                |
| urine albumin/creatinine ratio (ACR)                        | Method: _____ Reagent info _____<br>Unit: _____ Reference range: _____<br>Evaluation time (if not consistent) _____<br>Reason for extra missing data _____                                                                    |
| All-cause mortality                                         | Evaluation criteria: _____<br>Evaluation time (if not consistent) _____<br>Reason for extra missing data _____                                                                                                                |
| <b>Other information</b>                                    |                                                                                                                                                                                                                               |
| Key conclusion of authors                                   |                                                                                                                                                                                                                               |
| Correspondence required                                     | Study author contacted: yes <input type="checkbox"/> no <input type="checkbox"/><br>Study author replied: yes <input type="checkbox"/> no <input type="checkbox"/><br>Information asked: _____<br>Information provided: _____ |











|                                                                                                               |                              |                                |             |                              |                                |                              |         |                    |                    |                    |          |
|---------------------------------------------------------------------------------------------------------------|------------------------------|--------------------------------|-------------|------------------------------|--------------------------------|------------------------------|---------|--------------------|--------------------|--------------------|----------|
| nephropathy                                                                                                   |                              |                                |             |                              |                                |                              |         |                    |                    |                    |          |
| Progression of diabetic neuropathy                                                                            |                              |                                |             |                              |                                |                              |         |                    |                    |                    |          |
| Number of patients experiencing myocardial infarction                                                         |                              |                                |             |                              |                                |                              |         |                    |                    |                    |          |
| Number of patients experiencing stroke                                                                        |                              |                                |             |                              |                                |                              |         |                    |                    |                    |          |
| Number of patients experiencing amputation of at least one digit                                              |                              |                                |             |                              |                                |                              |         |                    |                    |                    |          |
| Number of patients experiencing ischemic limb disease                                                         |                              |                                |             |                              |                                |                              |         |                    |                    |                    |          |
| Number of patients experiencing heart failure                                                                 |                              |                                |             |                              |                                |                              |         |                    |                    |                    |          |
| All-cause mortality                                                                                           |                              |                                |             |                              |                                |                              |         |                    |                    |                    |          |
| <b>Outcome data-dichotomous data (year 3)-2 (when applicable, i.e. more than 2 comparative arms involved)</b> |                              |                                |             |                              |                                |                              |         |                    |                    |                    |          |
|                                                                                                               | Group 3 (Intervention_____)  |                                |             | Group 4 (Intervention_____)  |                                |                              |         |                    |                    |                    |          |
|                                                                                                               | Total number of participants | Reported participants for each | Case number | Total number of participants | Reported participants for each | Total number of participants | p-value | Estimate of effect | 95% CI Lower limit | 95% CI Upper limit | Comments |







| Group 3 (if applicable) (Intervention _____) (Lines may be added when necessary) |                                                                                                            |                                 |
|----------------------------------------------------------------------------------|------------------------------------------------------------------------------------------------------------|---------------------------------|
| Coding of Adverse event                                                          | Quotation from report regarding timing, severity, presentation, diagnosis, and management of adverse event | Anologue score of adverse event |
|                                                                                  |                                                                                                            |                                 |
|                                                                                  |                                                                                                            |                                 |
|                                                                                  |                                                                                                            |                                 |
|                                                                                  |                                                                                                            |                                 |
|                                                                                  |                                                                                                            |                                 |
|                                                                                  |                                                                                                            |                                 |
|                                                                                  |                                                                                                            |                                 |
|                                                                                  |                                                                                                            |                                 |
|                                                                                  |                                                                                                            |                                 |

| Group 4 (if applicable) (Intervention _____) (Lines may be added when necessary) |                                                                                                            |                                 |
|----------------------------------------------------------------------------------|------------------------------------------------------------------------------------------------------------|---------------------------------|
| Coding of Adverse event                                                          | Quotation from report regarding timing, severity, presentation, diagnosis, and management of adverse event | Anologue score of adverse event |
|                                                                                  |                                                                                                            |                                 |
|                                                                                  |                                                                                                            |                                 |
|                                                                                  |                                                                                                            |                                 |
|                                                                                  |                                                                                                            |                                 |
|                                                                                  |                                                                                                            |                                 |
|                                                                                  |                                                                                                            |                                 |
|                                                                                  |                                                                                                            |                                 |
|                                                                                  |                                                                                                            |                                 |
|                                                                                  |                                                                                                            |                                 |

**Outcome data (year 5, if applicable)-Continuous data-1**











|                                                                                                              |                              |                                |             |                              |                                |                              |         |                    |                    |                    |          |
|--------------------------------------------------------------------------------------------------------------|------------------------------|--------------------------------|-------------|------------------------------|--------------------------------|------------------------------|---------|--------------------|--------------------|--------------------|----------|
| nephropathy                                                                                                  |                              |                                |             |                              |                                |                              |         |                    |                    |                    |          |
| Progression of diabetic neuropathy                                                                           |                              |                                |             |                              |                                |                              |         |                    |                    |                    |          |
| Number of patients experiencing myocardial infarction                                                        |                              |                                |             |                              |                                |                              |         |                    |                    |                    |          |
| Number of patients experiencing stroke                                                                       |                              |                                |             |                              |                                |                              |         |                    |                    |                    |          |
| Number of patients experiencing amputation of at least one digit                                             |                              |                                |             |                              |                                |                              |         |                    |                    |                    |          |
| Number of patients experiencing ischemic limb disease                                                        |                              |                                |             |                              |                                |                              |         |                    |                    |                    |          |
| Number of patients experiencing heart failure                                                                |                              |                                |             |                              |                                |                              |         |                    |                    |                    |          |
| All-cause mortality                                                                                          |                              |                                |             |                              |                                |                              |         |                    |                    |                    |          |
| <b>Outcome data-dichotomous data (year 5, if applicable )-2 (when more than 2 comparative arms involved)</b> |                              |                                |             |                              |                                |                              |         |                    |                    |                    |          |
|                                                                                                              | Group 3 (Intervention_____)  |                                |             | Group 4 (Intervention_____)  |                                |                              |         |                    |                    |                    |          |
|                                                                                                              | Total number of participants | Reported participants for each | Case number | Total number of participants | Reported participants for each | Total number of participants | p-value | Estimate of effect | 95% CI Lower limit | 95% CI Upper limit | Comments |
